# Supplementary material for: Predicting Early Intussusception Recurrence: A Multicenter Study of an Abdominal Ultrasound-Based Radiomics-Deep Learning Model
Source: Research Square preprint supplement (doi:10.21203/rs.3.rs-8624625/v1), 2026-01-30
Supplement: Supplementary file 1 [file e73e6d047e8441302db14645.docx]

**Predicting Early Intussusception Recurrence: A Multicenter Study of an Abdominal Ultrasound-Based Radiomics-Deep Learning Model**

**Supplementary Material**

**1.** **Hyperparameters for training the deep-learning models**

normalize_method='imagenet',

model_name=model,

gpus=[0],

batch_size=32,

epochs=90,

init_lr=0.01,

optimizer='sgd',

retrain=None,

add_date=False,

iters_start=0,

iters_verbose=1,

class_weights=[0.3, 0.7],

save_per_epoch=False,

pretrained=True

Table. S1 . Performance Metrics of Radiomics (Rad), Deep Learning (DL), and Fused DLR Features with Different Machine Learning Classifiers in the Training Cohort

| **Model** |  | **Accuracy** | **AUC** | **95% CI** | **Sensitivity** | **Specificity** | **PPV** | **Cohort** |
| --- | --- | --- | --- | --- | --- | --- | --- | --- |
| DLR | KNN | 0.672 | 0.753 | 0.674-0.831 | 0.542 | 0.882 | 0.882 | Train |
|  | Random  Forest | 0.724 | 0.836 | 0.651-0.820 | 0.663 | 0.824 | 0.859 | Train |
|  | XG Boost | 0.866 | 0.913 | 0.850-0.966 | 0.807 | 0.961 | 0.971 | Train |
| DL | KNN | 0.642 | 0.712 | 0.628-0.766 | 0.458 | 0.941 | 0.927 | Train |
|  | Random  Forest | 0.687 | 0.720 | 0.943-0.806 | 0.578 | 0.883 | 0.873 | Train |
|  | XG Boost | 0.806 | 0.821 | 0.746-0.960 | 0.771 | 0.883 | 0.901 | Train |
| Rad | KNN | 0.694 | 0.748 | 0.668-0.827 | 0.542 | 0.941 | 0.937 | Train |
|  | Random  Forest | 0.739 | 0.774 | 0.665-0.853 | 0.663 | 0.883 | 0.887 | Train |
|  | XG Boost | 0.781 | 0.780 | 0.700-0.856 | 0.795 | 0.708 | 0.815 | Train |

Table. S2 Performance Metrics of Radiomics (Rad), Deep Learning (DL), and Fused DLR Features with Different Machine Learning Classifiers in the validation Cohort

| **Model** |  | **Accuracy** | **AUC** | **95% CI** | **Sensitivity** | **Specificity** | **PPV** | **Cohort** |
| --- | --- | --- | --- | --- | --- | --- | --- | --- |
| DLR | KNN | 0.707 | 0.731 | 0.568-0.893 | 0.696 | 0.750 | 0.914 | Val |
|  | Random  Forest | 0.672 | 0.727 | 0.585-0.869 | 0.630 | 0.833 | 0.935 | Val |
|  | XG Boost | 0621 | 0.783 | 0.643-0.921 | 0.543 | 0.917 | 0.962 | Val |
| DL | KNN | 0.862 | 0.688 | 0.493-0.835 | 1.000 | 0.333 | 0.852 | Val |
|  | Random  Forest | 0.517 | 0.625 | 0.425-0.907 | 0.435 | 0.833 | 0.909 | Val |
|  | XG Boost | 0.810 | 0.757 | 0.565-0.948 | 0.848 | 0.667 | 0.907 | Val |
| Rad | KNN | 0.655 | 0.559 | 0.399-0.718 | 0.717 | 0.417 | 0.825 | Val |
|  | Random  Forest | 0.672 | 0.688 | 0.504-0.870 | 0.652 | 0.750 | 0.909 | Val |
|  | XG Boost | 0.793 | 0.692 | 0.466-0.888 | 0.826 | 0.667 | 0.905 | Val |

Table. S3 Performance Metrics of Radiomics (Rad), Deep Learning (DL), and Fused DLR Features with Different Machine Learning Classifiers in the external test1 Cohort

| **Model** |  | **Accuracy** | **AUC** | **95% CI** | **Sensitivity** | **Specificity** | **PPV** | **Cohort** |
| --- | --- | --- | --- | --- | --- | --- | --- | --- |
| DLR | KNN | 0.726 | 0.757 | 0.651-0.8623 | 0.746 | 0.667 | 0.869 | Test1 |
|  | Random  Forest | 0.589 | 0.712 | 0.596-0.827 | 0.493 | 0.875 | 0.921 | Test1 |
|  | XG Boost | 0.684 | 0.790 | 0.684-0.894 | 0.620 | 0.875 | 0.936 | Test1 |
| DL | KNN | 0.853 | 0.694 | 0.577-0.810 | 0.682 | 0.625 | 0.639 | Test1 |
|  | Random  Forest | 0.558 | 0.707 | 0.594-0.818 | 0.437 | 0.917 | 0.939 | Test1 |
|  | XG Boost | 0.663 | 0.733 | 0.627-0.839 | 0.620 | 0.792 | 0.898 | Test1 |
| Rad | KNN | 0.568 | 0.712 | 0.695-0.827 | 0.493 | 0.792 | 0.875 | Test1 |
|  | Random  Forest | 0.653 | 0.685 | 0.548-0.821 | 0.606 | 0.792 | 0.896 | Test1 |
|  | XGBoost | 0.632 | 0.691 | 0.574-0.506 | 0.592 | 0.750 | 0.875 | Test1 |

Table. S4 Performance Metrics of Radiomics (Rad), Deep Learning (DL), and Fused DLR Features with Different Machine Learning Classifiers in the external test2 Cohort

| **Model** |  | **Accuracy** | **AUC** | **95% CI** | **Sensitivity** | **Specificity** | **PPV** | **Cohort** |
| --- | --- | --- | --- | --- | --- | --- | --- | --- |
| DLR | KNN | 0.694 | 0.738 | 0.634-0.842 | 0.760 | 0.600 | 0.731 | Test2 |
|  | Random  Forest | 0.741 | 0.729 | 0.613-0.843 | 0.820 | 0.629 | 0.759 | Test2 |
|  | XGBoost | 0.753 | 0.746 | 0.635-0.856 | 0.740 | 0.771 | 0.822 | Test2 |
| DL | KNN | 0.718 | 0.743 | 0.638-0.846 | 0.820 | 0.571 | 0.732 | Test2 |
|  | KNN | 0.718 | 0.743 | 0.638-0.846 | 0.820 | 0.571 | 0.732 | Test2 |
|  | Random  Forest | 0.706 | 0.702 | 0.587-0.816 | 0.840 | 0.514 | 0.712 | Test2 |
| Rad | KNN | 0.541 | 0.498 | 0.374-0.820 | 0.640 | 0.400 | 0.604 | Test2 |
|  | Random  Forest | 0.482 | 0.526 | 0.400-0.851 | 0.140 | 0.971 | 0.875 | Test2 |
|  | XGBoost | 0.541 | 0.559 | 0.435-0.852 | 0.260 | 0.943 | 0.867 | Test2 |
